# Supplementary material for: Argentine ants (Linepithema humile) use adaptable transportation networks to track changes in resource quality
Source: Oxford University Press journal article supplement (doi:10.1242/jeb.144238), 2017-02-15
Supplement: jeb144238supp.pdf [file jeb144238supp.pdf]

Supplementary information

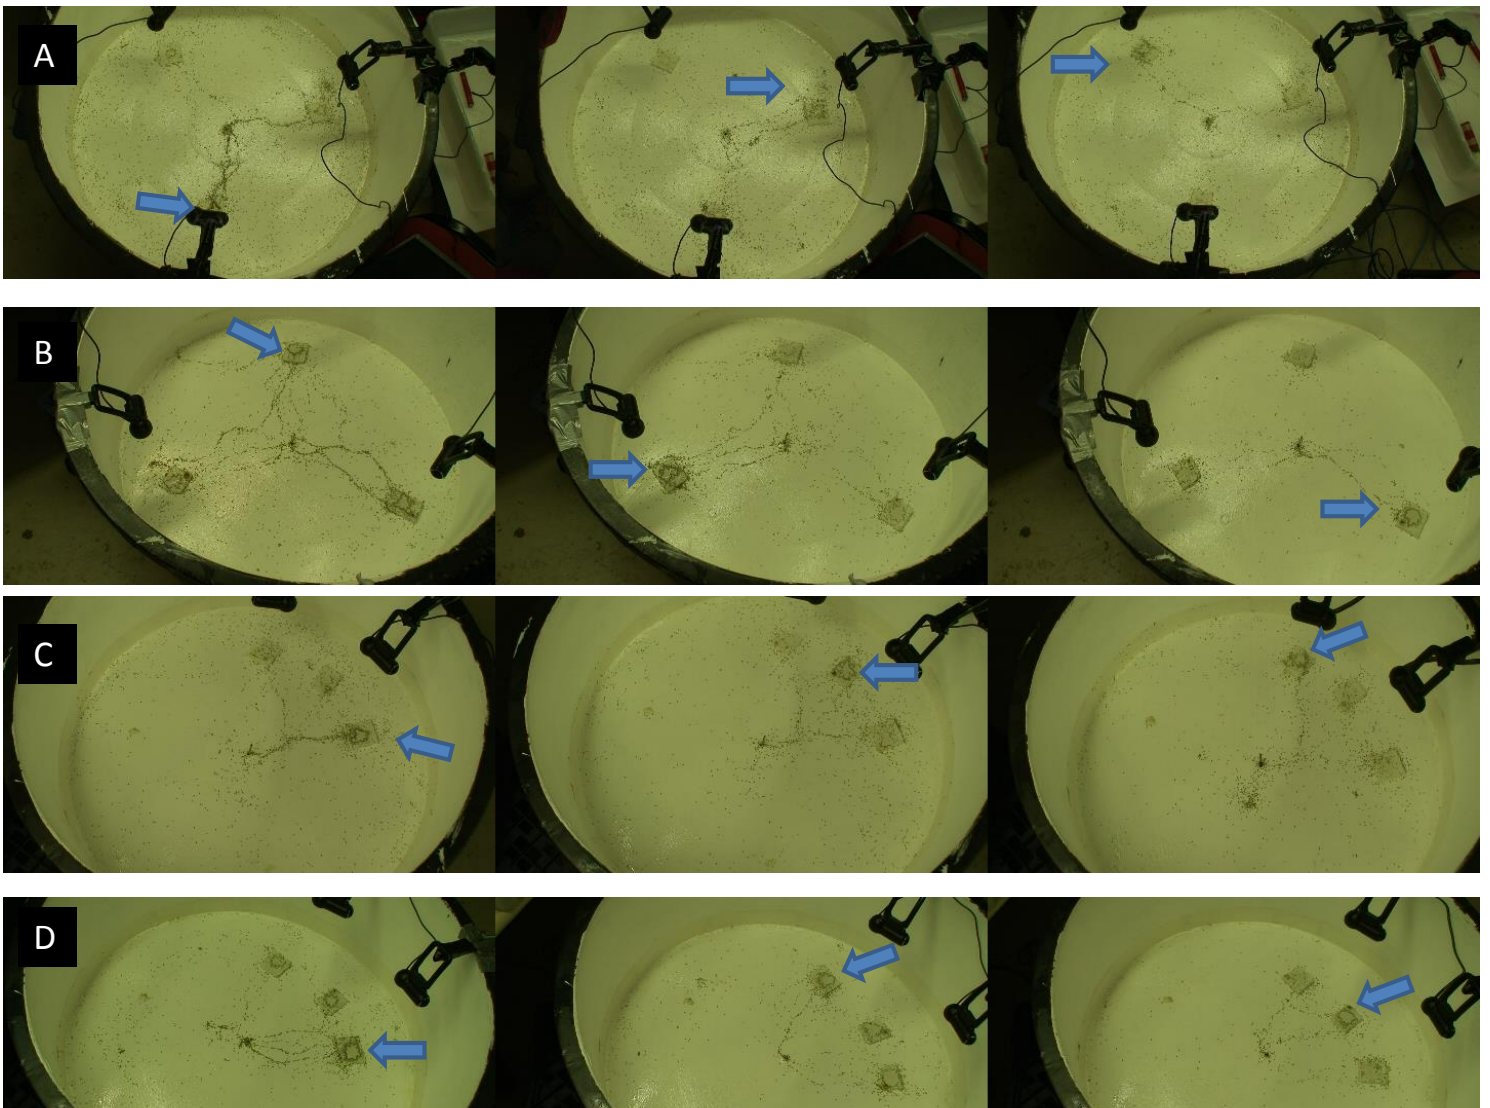

Figure 1. Selected composite images showing trails at time interval 1, 2, 3 (from the right). The arrows point to the feeder that is currently filled with the higher concentration feeder. A and B show sparse feeder configuration C and D show clustered feeder configuration.
